# Supplementary material
Source: PubMed Central journal article supplement (PMC3761372)
Supplement: NIHMS476730-supplement-Supporting_data.pdf [file NIHMS476730-supplement-Supporting_data.pdf]

| Protein Name         | Peptide Sequence                          | Precursor<br>m/z | Product<br>m/z | Collision      |                     |                   |             |
|----------------------|-------------------------------------------|------------------|----------------|----------------|---------------------|-------------------|-------------|
|                      |                                           |                  |                | Energy<br>(eV) | Precursor<br>charge | Product<br>charge | ion<br>type |
| Lab 1- PSA Isoform 3 | SVILLGR                                   | 379.25           | 413.275        | 14             | 2                   | 1                 | b3          |
|                      |                                           | 379.25           | 458.308        | 18             | 2                   | 1                 | y4          |
|                      |                                           | 379.25           | 526.359        | 10             | 2                   | 1                 | b4          |
|                      |                                           | 379.25           | 571.392        | 14             | 2                   | 1                 | y5          |
|                      | SVILLGR[HeavyR]                           | 384.254          | 413.275        | 14             | 2                   | 1                 | b3          |
|                      |                                           | 384.254          | 468.316        | 18             | 2                   | 1                 | y4          |
|                      |                                           | 384.254          | 526.359        | 10             | 2                   | 1                 | b4          |
|                      |                                           | 384.254          | 581.4          | 14             | 2                   | 1                 | y5          |
| Lab 1- PSA Isoform 4 | DTIVANP                                   | 729.378          | 429.234        | 13             | 1                   | 1                 | b3          |
|                      |                                           | 729.378          | 500.271        | 13             | 1                   | 1                 | b4          |
|                      |                                           | 729.378          | 614.314        | 13             | 1                   | 1                 | b5          |
|                      | DTIV[HeavyV]ANP                           | 735.391          | 435.248        | 13             | 1                   | 1                 | b3          |
|                      |                                           | 735.391          | 506.285        | 13             | 1                   | 1                 | b4          |
|                      |                                           | 735.391          | 620.328        | 13             | 1                   | 1                 | b5          |
| Lab 2 - HGH          | FPTIPLSR                                  | 465.774          | 392.24         | 19             | 2                   | 2                 | y7          |
|                      |                                           | 465.774          | 472.287        | 21             | 2                   | 1                 | y4          |
|                      |                                           | 465.774          | 686.419        | 21             | 2                   | 1                 | y6          |
|                      | FPTIPLSR[HeavyR]                          | 470.778          | 397.244        | 19             | 2                   | 2                 | y7          |
|                      |                                           | 470.778          | 482.296        | 21             | 2                   | 1                 | y4          |
|                      |                                           | 470.778          | 696.427        | 21             | 2                   | 1                 | y6          |
| Lab 3 - LDHC         | EELFLSIPC[Carboxyamidomethyl]VLGR         | 766.911          | 701.376        | 26             | 2                   | 1                 | y6          |
|                      |                                           | 766.911          | 901.492        | 32             | 2                   | 1                 | y8          |
|                      |                                           | 766.911          | 1014.576       | 24             | 2                   | 1                 | y9          |
|                      | EELFLSIPC[Carboxyamidomethyl]VLGR[HeavyR] | 771.915          | 711.384        | 26             | 2                   | 1                 | y6          |
|                      |                                           | 771.915          | 911.5          | 32             | 2                   | 1                 | y8          |
|                      |                                           | 771.915          | 1024.584       | 24             | 2                   | 1                 | y9          |
| Lab 3 - PTGDS        | AQGFTEDTIVFLPQTDK                         | 955.481          | 588.298        | 32             | 2                   | 1                 | y5          |
|                      |                                           | 955.481          | 701.382        | 28             | 2                   | 1                 | y6          |
|                      |                                           | 955.481          | 947.519        | 26             | 2                   | 1                 | y8          |
|                      | AQGFTEDTIVFLPQTDK[HeavyK]                 | 959.488          | 596.312        | 32             | 2                   | 1                 | y5          |
|                      |                                           | 959.488          | 709.397        | 28             | 2                   | 1                 | y6          |

|                 |                                       |         |         |    |   |      |
|-----------------|---------------------------------------|---------|---------|----|---|------|
|                 |                                       | 959.488 | 955.533 | 26 | 2 | 1 y8 |
| Lab 3 - SPAG11B | IC[Carboxyamidomethyl]VDFLGPR         | 538.781 | 589.345 | 27 | 2 | 1 y5 |
|                 |                                       | 538.781 | 704.372 | 19 | 2 | 1 y6 |
|                 |                                       | 538.781 | 803.441 | 23 | 2 | 1 y7 |
|                 | IC[Carboxyamidomethyl]VDFLGPR[HeavyR] | 543.786 | 599.353 | 27 | 2 | 1 y5 |
|                 |                                       | 543.786 | 714.38  | 19 | 2 | 1 y6 |
|                 |                                       | 543.786 | 813.449 | 23 | 2 | 1 y7 |
| Lab 3 - FAM12B  | NAYVWVQNPLK                           | 666.359 | 698.419 | 20 | 2 | 1 y6 |
|                 |                                       | 666.359 | 884.498 | 20 | 2 | 1 y7 |
|                 |                                       | 666.359 | 983.567 | 26 | 2 | 1 y8 |
|                 | NAYVWVQNPLK[HeavyK]                   | 670.366 | 706.433 | 20 | 2 | 1 y6 |
|                 |                                       | 670.366 | 892.513 | 20 | 2 | 1 y7 |
|                 |                                       | 670.366 | 991.581 | 26 | 2 | 1 y8 |
| Lab 4 - PSA     | DKSVILLGR                             | 500.811 | 670.46  | 23 | 2 | 1 y6 |
|                 |                                       | 500.811 | 757.493 | 23 | 2 | 1 y7 |
|                 | DK[13C]SVILLGR                        | 503.318 | 670.46  | 23 | 2 | 1 y6 |
|                 |                                       | 503.318 | 757.493 | 23 | 2 | 1 y7 |
